# Supplementary material for: Life history and past demography maintain genetic structure, outcrossing rate, contemporary pollen gene flow of an understory herb in a highly fragmented rainforest
Source: PeerJ journal article supplement (doi:10.7717/peerj.2764), 2016-12-22
Supplement: Data_mating_system.pdf [file Data_mating_system.pdf]

| Fragment size | Population | Family  | Primer 1 |       | Primer 2 |        | Primer 3 |
|---------------|------------|---------|----------|-------|----------|--------|----------|
|               |            |         | 432-1    | 432-2 | 5409-1   | 5409-2 | 1233-1   |
| LARGE         | 11 Lrg     | ZCT12   | 116      | 124   | 184      | 184    | 120      |
| LARGE         | 11 Lrg     | ZCT12   | 120      | 124   | 184      | 184    | 118      |
| LARGE         | 11 Lrg     | ZCT12!  | 120      | 124   | 184      | 184    | 122      |
| LARGE         | 11 Lrg     | ZCT14   | 120      | 120   | 180      | 180    | 122      |
| LARGE         | 11 Lrg     | ZCT14   | 120      | 124   | 180      | 180    | 122      |
| LARGE         | 11 Lrg     | ZCT14   | 120      | 120   | 180      | 184    | 124      |
| LARGE         | 11 Lrg     | ZCT14   | 120      | 120   | 180      | 180    | 122      |
| LARGE         | 11 Lrg     | ZCT14!  | 120      | 124   | 180      | 180    | -9       |
| LARGE         | 11 Lrg     | ZCT21   | 114      | 120   | 184      | 184    | 120      |
| LARGE         | 11 Lrg     | ZCT21   | 114      | 120   | 184      | 184    | 118      |
| LARGE         | 11 Lrg     | ZCT21   | 114      | 120   | 184      | 186    | 118      |
| LARGE         | 11 Lrg     | ZCT21   | 114      | 120   | 186      | 188    | 120      |
| LARGE         | 11 Lrg     | ZCT21   | 114      | 120   | 184      | 186    | 118      |
| LARGE         | 11 Lrg     | ZCT21!  | 114      | 120   | 184      | 186    | 120      |
| LARGE         | 11 Lrg     | ZCT25   | 116      | 120   | 184      | 186    | 120      |
| LARGE         | 11 Lrg     | ZCT25   | 116      | 120   | 184      | 186    | 120      |
| LARGE         | 11 Lrg     | ZCT25   | 116      | 120   | 184      | 184    | 120      |
| LARGE         | 11 Lrg     | ZCT25   | 120      | 122   | 184      | 184    | 120      |
| LARGE         | 11 Lrg     | ZCT25   | 116      | 120   | 184      | 186    | 122      |
| LARGE         | 11 Lrg     | ZCT25   | 114      | 120   | 184      | 186    | 122      |
| LARGE         | 11 Lrg     | ZCT25!  | 116      | 120   | 184      | 186    | 122      |
| LARGE         | 11 Lrg     | ZCT3    | 116      | 124   | 184      | 184    | 122      |
| LARGE         | 11 Lrg     | ZCT3!   | 120      | 124   | 184      | 184    | 124      |
| LARGE         | 11 Lrg     | ZCT39   | 116      | 120   | 184      | 184    | 118      |
| LARGE         | 11 Lrg     | ZCT39   | 116      | 120   | 184      | 184    | 126      |
| LARGE         | 11 Lrg     | ZCT39   | 116      | 120   | 184      | 184    | 124      |
| LARGE         | 11 Lrg     | ZCT39   | 116      | 120   | 184      | 184    | 124      |
| LARGE         | 11 Lrg     | ZCT39   | 116      | 120   | 184      | 184    | 124      |
| LARGE         | 11 Lrg     | ZCT39   | 116      | 116   | 184      | 184    | 118      |
| LARGE         | 11 Lrg     | ZCT39   | 114      | 120   | 184      | 186    | 124      |
| LARGE         | 11 Lrg     | ZCT39!  | 116      | 120   | 184      | 184    | 124      |
| LARGE         | 9 Lrg      | SII14A! | 116      | 124   | 184      | 184    | 120      |
| LARGE         | 9 Lrg      | SII14A  | -9       | -9    | 184      | 184    | 120      |
| LARGE         | 9 Lrg      | SII14A  | 116      | 120   | 184      | 184    | 120      |
| LARGE         | 9 Lrg      | SII14A  | 112      | 116   | 184      | 184    | 120      |
| LARGE         | 9 Lrg      | SII14A  | 116      | 120   | 184      | 188    | 118      |
| LARGE         | 9 Lrg      | SII14A  | 116      | 124   | 184      | 186    | 120      |
| LARGE         | 9 Lrg      | SII14A  | 116      | 120   | 184      | 186    | 118      |
| LARGE         | 9 Lrg      | SII14A  | 116      | 120   | 184      | 186    | 118      |
| LARGE         | 9 Lrg      | SII14A  | 116      | 120   | 184      | 184    | 124      |
| LARGE         | 9 Lrg      | SII14A  | 116      | 120   | 184      | 184    | 124      |
| LARGE         | 9 Lrg      | SII14A  | 116      | 120   | 184      | 184    | 118      |
| LARGE         | 9 Lrg      | SII18   | 116      | 120   | 184      | 186    | 120      |
| LARGE         | 9 Lrg      | SII18   | 120      | 124   | 186      | 186    | 120      |
| LARGE         | 9 Lrg      | SII18   | 120      | 124   | 184      | 186    | 120      |
| LARGE         | 9 Lrg      | SII18   | 114      | 120   | 184      | 184    | 118      |

|       |       |         |     |     |     |     |     |
|-------|-------|---------|-----|-----|-----|-----|-----|
| LARGE | 9 Lrg | SII18   | 120 | 124 | 184 | 186 | 120 |
| LARGE | 9 Lrg | SII18   | 120 | 124 | 184 | 184 | 120 |
| LARGE | 9 Lrg | SII18!  | 120 | 124 | 184 | 186 | 120 |
| LARGE | 9 Lrg | SII19B  | 114 | 120 | 184 | 184 | 122 |
| LARGE | 9 Lrg | SII19B  | 116 | 120 | 184 | 184 | 122 |
| LARGE | 9 Lrg | SII19B  | 120 | 120 | 184 | 184 | 122 |
| LARGE | 9 Lrg | SII19B! | 114 | 120 | 184 | 184 | 122 |
| LARGE | 9 Lrg | SII19B  | 114 | 120 | 184 | 188 | 118 |
| LARGE | 9 Lrg | SII20B! | 114 | 120 | 184 | 184 | 122 |
| LARGE | 9 Lrg | SII20B  | 114 | 120 | 184 | 184 | 118 |
| LARGE | 9 Lrg | SII20B  | 114 | 120 | 184 | 188 | 118 |
| LARGE | 9 Lrg | SII20B  | 114 | 120 | 184 | 188 | 118 |
| LARGE | 9 Lrg | SII20B  | 114 | 120 | 184 | 188 | 122 |
| LARGE | 9 Lrg | SII20B  | 114 | 120 | 184 | 184 | 116 |
| LARGE | 9 Lrg | SII26   | 116 | 120 | 184 | 184 | 120 |
| LARGE | 9 Lrg | SII26   | 120 | 124 | 184 | 184 | 122 |
| LARGE | 9 Lrg | SII26   | 116 | 120 | 184 | 184 | 120 |
| LARGE | 9 Lrg | SII26   | 120 | 124 | 184 | 184 | 120 |
| LARGE | 9 Lrg | SII26   | 120 | 124 | 184 | 186 | 122 |
| LARGE | 9 Lrg | SII26   | 116 | 120 | 184 | 184 | 120 |
| LARGE | 9 Lrg | SII26   | 120 | 124 | 184 | 184 | 120 |
| LARGE | 9 Lrg | SII26   | 120 | 124 | 184 | 186 | 118 |
| LARGE | 9 Lrg | SII26!  | 120 | 124 | 184 | 184 | 118 |
| LARGE | 9 Lrg | SII35A  | 120 | 120 | 184 | 186 | 118 |
| LARGE | 9 Lrg | SII35A  | 120 | 120 | 184 | 186 | 118 |
| LARGE | 9 Lrg | SII35A  | 116 | 120 | 184 | 186 | 118 |
| LARGE | 9 Lrg | SII35A  | 120 | 120 | 184 | 186 | 118 |
| LARGE | 9 Lrg | SII35A  | 120 | 120 | 184 | 186 | 118 |
| LARGE | 9 Lrg | SII35A  | 120 | 120 | 184 | 188 | 116 |
| LARGE | 9 Lrg | SII35A! | 120 | 120 | 184 | 186 | 118 |
| LARGE | 9 Lrg | SII4    | 120 | 120 | 188 | 188 | 122 |
| LARGE | 9 Lrg | SII4    | 120 | 120 | 184 | 188 | 122 |
| LARGE | 9 Lrg | SII4    | 116 | 120 | 184 | 188 | 122 |
| LARGE | 9 Lrg | SII4    | 120 | 120 | 186 | 188 | 122 |
| LARGE | 9 Lrg | SII4    | 116 | 120 | 184 | 188 | 120 |
| LARGE | 9 Lrg | SII4    | 120 | 120 | 188 | 188 | 122 |
| LARGE | 9 Lrg | SII4    | 116 | 120 | 184 | 188 | 120 |
| LARGE | 9 Lrg | SII4!   | 120 | 120 | 184 | 188 | 122 |
| LARGE | 9 Lrg | SII44   | 120 | 120 | 184 | 184 | 122 |
| LARGE | 9 Lrg | SII44   | 120 | 120 | 184 | 184 | 122 |
| LARGE | 9 Lrg | SII44   | 120 | 120 | 184 | 184 | 122 |
| LARGE | 9 Lrg | SII44   | 120 | 120 | 184 | 184 | 122 |
| LARGE | 9 Lrg | SII44   | 120 | 120 | 184 | 184 | 122 |
| LARGE | 9 Lrg | SII44   | 120 | 120 | 184 | 184 | 122 |
| LARGE | 9 Lrg | SII44   | 120 | 120 | 184 | 184 | 122 |
| LARGE | 9 Lrg | SII44   | 120 | 124 | 184 | 186 | -9  |
| LARGE | 9 Lrg | SII44   | 120 | 120 | 184 | 184 | 122 |
| LARGE | 9 Lrg | SII44   | 120 | 120 | 184 | 184 | 122 |

|        |       |        |     |     |     |     |     |
|--------|-------|--------|-----|-----|-----|-----|-----|
| LARGE  | 9 Lrg | SII44! | 120 | 120 | 184 | 184 | 122 |
| LARGE  | 9 Lrg | SII53  | 120 | 120 | 184 | 184 | 118 |
| LARGE  | 9 Lrg | SII53  | 120 | 120 | 184 | 184 | 118 |
| LARGE  | 9 Lrg | SII53  | 120 | 120 | 184 | 184 | 120 |
| LARGE  | 9 Lrg | SII53  | 120 | 120 | 184 | 186 | 120 |
| LARGE  | 9 Lrg | SII53  | 120 | 120 | 184 | 184 | 120 |
| LARGE  | 9 Lrg | SII53  | 120 | 120 | 184 | 184 | 120 |
| LARGE  | 9 Lrg | SII53! | 120 | 120 | 184 | 184 | 120 |
| LARGE  | 9 Lrg | SII54  | 120 | 124 | 184 | 184 | 120 |
| LARGE  | 9 Lrg | SII54  | 116 | 120 | 184 | 186 | 120 |
| LARGE  | 9 Lrg | SII54! | 120 | 124 | 184 | 184 | 120 |
| MEDIUM | 7 Med | RC10   | 114 | 120 | 186 | 186 | 122 |
| MEDIUM | 7 Med | RC10   | 114 | 120 | 184 | 186 | 124 |
| MEDIUM | 7 Med | RC10   | 120 | 120 | 184 | 184 | 122 |
| MEDIUM | 7 Med | RC10   | 120 | 124 | 184 | 186 | 124 |
| MEDIUM | 7 Med | RC10   | 120 | 120 | 184 | 184 | 124 |
| MEDIUM | 7 Med | RC10   | 120 | 124 | 184 | 184 | 124 |
| MEDIUM | 7 Med | RC10   | 116 | 120 | 184 | 184 | 120 |
| MEDIUM | 7 Med | RC10   | 120 | 124 | 184 | 186 | 122 |
| MEDIUM | 7 Med | RC10   | 114 | 120 | 184 | 184 | 120 |
| MEDIUM | 7 Med | RC10   | 114 | 120 | 184 | 186 | 124 |
| MEDIUM | 7 Med | RC10!  | 114 | 120 | 184 | 186 | 122 |
| MEDIUM | 7 Med | RC11   | 120 | 124 | 184 | 184 | 120 |
| MEDIUM | 7 Med | RC11   | 114 | 120 | 184 | 184 | 120 |
| MEDIUM | 7 Med | RC11   | 116 | 120 | 184 | 184 | 126 |
| MEDIUM | 7 Med | RC11   | 116 | 124 | 184 | 186 | 120 |
| MEDIUM | 7 Med | RC11   | 116 | 120 | 184 | 184 | 120 |
| MEDIUM | 7 Med | RC11   | 120 | 124 | 184 | 184 | 126 |
| MEDIUM | 7 Med | RC11   | 116 | 120 | 184 | 184 | 120 |
| MEDIUM | 7 Med | RC11   | 120 | 124 | 184 | 184 | 120 |
| MEDIUM | 7 Med | RC11   | 116 | 124 | 184 | 186 | -9  |
| MEDIUM | 7 Med | RC11!  | 116 | 120 | 184 | 184 | 120 |
| MEDIUM | 7 Med | RC13   | 120 | 124 | 186 | 186 | 118 |
| MEDIUM | 7 Med | RC13   | 120 | 124 | 186 | 186 | 122 |
| MEDIUM | 7 Med | RC13   | 120 | 124 | 184 | 186 | 122 |
| MEDIUM | 7 Med | RC13   | 120 | 124 | 186 | 186 | 122 |
| MEDIUM | 7 Med | RC13   | 120 | 120 | 184 | 184 | 122 |
| MEDIUM | 7 Med | RC13   | 120 | 120 | 184 | 184 | 122 |
| MEDIUM | 7 Med | RC13   | 120 | 124 | 184 | 186 | 122 |
| MEDIUM | 7 Med | RC13   | 120 | 120 | 186 | 186 | 122 |
| MEDIUM | 7 Med | RC13   | 120 | 124 | 184 | 186 | 122 |
| MEDIUM | 7 Med | RC13!  | 120 | 124 | 184 | 186 | 122 |
| MEDIUM | 7 Med | RC37   | 116 | 120 | 184 | 186 | 120 |
| MEDIUM | 7 Med | RC37   | 116 | 120 | 184 | 186 | 118 |
| MEDIUM | 7 Med | RC37   | 120 | 120 | 184 | 186 | 120 |
| MEDIUM | 7 Med | RC37   | 116 | 120 | 184 | 186 | 118 |
| MEDIUM | 7 Med | RC37   | 120 | 120 | 184 | 186 | 118 |
| MEDIUM | 7 Med | RC37   | 116 | 116 | 180 | 184 | 120 |
| MEDIUM | 7 Med | RC37   | 120 | 120 | 184 | 186 | 118 |

|        |       |       |     |     |     |     |     |
|--------|-------|-------|-----|-----|-----|-----|-----|
| MEDIUM | 7 Med | RC37  | 116 | 120 | 184 | 186 | 120 |
| MEDIUM | 7 Med | RC37! | 116 | 120 | 184 | 186 | 118 |
| MEDIUM | 7 Med | RC40  | 120 | 124 | 184 | 184 | 118 |
| MEDIUM | 7 Med | RC40  | 120 | 124 | 184 | 186 | 120 |
| MEDIUM | 7 Med | RC40  | 120 | 124 | 184 | 184 | 118 |
| MEDIUM | 7 Med | RC40  | 120 | 120 | 184 | 184 | 118 |
| MEDIUM | 7 Med | RC40  | 120 | 124 | 184 | 186 | 118 |
| MEDIUM | 7 Med | RC40  | 120 | 124 | 184 | 186 | 118 |
| MEDIUM | 7 Med | RC40  | 120 | 120 | 184 | 186 | 120 |
| MEDIUM | 7 Med | RC40  | 116 | 124 | 184 | 184 | 118 |
| MEDIUM | 7 Med | RC40  | 120 | 124 | 184 | 186 | 118 |
| MEDIUM | 7 Med | RC40! | 120 | 124 | 184 | 186 | 118 |
| MEDIUM | 7 Med | RC8   | 114 | 120 | 184 | 184 | 118 |
| MEDIUM | 7 Med | RC8   | 120 | 124 | 184 | 184 | 120 |
| MEDIUM | 7 Med | RC8   | 120 | 120 | 184 | 184 | 120 |
| MEDIUM | 7 Med | RC8   | 124 | 124 | 184 | 184 | 118 |
| MEDIUM | 7 Med | RC8   | 120 | 124 | 184 | 184 | 122 |
| MEDIUM | 7 Med | RC8!  | 120 | 124 | 184 | 184 | 120 |
| MEDIUM | 6 Med | Bu16! | 120 | 124 | -9  | -9  | 116 |
| MEDIUM | 6 Med | Bu16  | 120 | 120 | 186 | 188 | 120 |
| MEDIUM | 6 Med | Bu16  | 120 | 124 | 186 | 188 | 120 |
| MEDIUM | 6 Med | Bu16  | 120 | 120 | 188 | 188 | 118 |
| MEDIUM | 6 Med | Bu16  | 120 | 120 | 188 | 188 | 116 |
| MEDIUM | 6 Med | Bu16  | 120 | 120 | 188 | 188 | 118 |
| MEDIUM | 6 Med | Bu16  | 120 | 120 | 186 | 188 | 116 |
| MEDIUM | 6 Med | Bu16  | 120 | 120 | 188 | 188 | 118 |
| MEDIUM | 6 Med | Bu17! | 116 | 120 | 184 | 186 | 120 |
| MEDIUM | 6 Med | Bu17  | 120 | 120 | 184 | 186 | 120 |
| MEDIUM | 6 Med | Bu17  | 120 | 120 | 184 | 184 | 120 |
| MEDIUM | 6 Med | Bu17  | 120 | 120 | 184 | 184 | 120 |
| MEDIUM | 6 Med | Bu17  | 120 | 120 | 184 | 184 | 118 |
| MEDIUM | 6 Med | Bu17  | 120 | 120 | 184 | 186 | 118 |
| MEDIUM | 6 Med | Bu17  | 120 | 120 | 184 | 184 | 120 |
| MEDIUM | 6 Med | Bu17  | 120 | 124 | 184 | 186 | 118 |
| MEDIUM | 6 Med | Bu17  | 120 | 120 | 184 | 186 | 122 |
| MEDIUM | 6 Med | Bu17  | 120 | 120 | 184 | 186 | 120 |
| MEDIUM | 6 Med | Bu17  | 120 | 120 | 184 | 184 | 120 |
| MEDIUM | 6 Med | Bu19! | 116 | 124 | 184 | 184 | 118 |
| MEDIUM | 6 Med | Bu19  | 116 | 124 | 184 | 184 | 118 |
| MEDIUM | 6 Med | Bu19  | 120 | 124 | 184 | 184 | 118 |
| MEDIUM | 6 Med | Bu19  | 120 | 124 | 184 | 184 | 118 |
| MEDIUM | 6 Med | Bu19  | 120 | 124 | 184 | 184 | 118 |
| MEDIUM | 6 Med | Bu19  | 120 | 124 | 184 | 186 | 118 |
| MEDIUM | 6 Med | Bu19  | 116 | 116 | 184 | 184 | 118 |
| MEDIUM | 6 Med | Bu19  | 116 | 124 | 184 | 184 | 118 |
| MEDIUM | 6 Med | Bu19  | 120 | 124 | 184 | 186 | 118 |
| MEDIUM | 6 Med | Bu19  | 124 | 124 | 184 | 184 | 120 |
| MEDIUM | 6 Med | Bu20! | 116 | 120 | 184 | 186 | 120 |
| MEDIUM | 6 Med | Bu20  | 116 | 124 | 184 | 186 | 120 |

|        |       |        |     |     |     |     |     |
|--------|-------|--------|-----|-----|-----|-----|-----|
| MEDIUM | 6 Med | Bu20   | 116 | 120 | 184 | 186 | 120 |
| MEDIUM | 6 Med | Bu20   | 120 | 124 | 184 | 184 | 122 |
| MEDIUM | 6 Med | Bu20   | 120 | 120 | 186 | 186 | 118 |
| MEDIUM | 6 Med | Bu20   | 112 | 116 | 184 | 184 | 120 |
| MEDIUM | 6 Med | Bu20   | 112 | 116 | 184 | 184 | 120 |
| MEDIUM | 6 Med | Bu20   | 116 | 120 | 184 | 186 | 116 |
| MEDIUM | 6 Med | Bu20   | 116 | 120 | 186 | 186 | 118 |
| MEDIUM | 6 Med | BU148! | 116 | 120 | 184 | 188 | 120 |
| MEDIUM | 6 Med | Bu48   | 120 | 124 | 184 | 188 | 120 |
| MEDIUM | 6 Med | Bu48   | 120 | 120 | 184 | 184 | 118 |
| MEDIUM | 6 Med | Bu48   | 120 | 124 | 184 | 188 | 118 |
| MEDIUM | 6 Med | Bu48   | 116 | 120 | 188 | 188 | 118 |
| MEDIUM | 6 Med | Bu48   | 120 | 120 | 188 | 188 | 118 |
| MEDIUM | 6 Med | Bu48   | 120 | 124 | 184 | 188 | 118 |
| MEDIUM | 6 Med | Bu49!  | 120 | 124 | 184 | 186 | -9  |
| MEDIUM | 6 Med | Bu49   | 116 | 124 | 184 | 184 | 120 |
| MEDIUM | 6 Med | Bu49   | 116 | 120 | 184 | 184 | 120 |
| MEDIUM | 6 Med | Bu49   | 116 | 120 | 184 | 188 | 122 |
| MEDIUM | 6 Med | Bu49   | 120 | 124 | 184 | 184 | 122 |
| MEDIUM | 6 Med | Bu49   | 116 | 120 | 184 | 186 | 122 |
| MEDIUM | 6 Med | Bu49   | 116 | 120 | 184 | 186 | 120 |
| MEDIUM | 6 Med | Bu49   | 116 | 124 | 186 | 188 | 120 |
| MEDIUM | 6 Med | Bu49   | 116 | 124 | 186 | 188 | 122 |
| MEDIUM | 6 Med | Bu55!  | 116 | 116 | 184 | 184 | 120 |
| MEDIUM | 6 Med | Bu55   | 116 | 116 | 184 | 188 | 120 |
| MEDIUM | 6 Med | Bu55   | 116 | 116 | 184 | 184 | 120 |
| MEDIUM | 6 Med | Bu60!  | 120 | 124 | 184 | 184 | 124 |
| MEDIUM | 6 Med | Bu60   | 120 | 124 | 184 | 186 | 122 |
| MEDIUM | 6 Med | Bu60   | 120 | 124 | 184 | 186 | 122 |
| MEDIUM | 6 Med | Bu60   | 120 | 120 | 184 | 184 | 122 |
| MEDIUM | 6 Med | Bu60   | 120 | 124 | 184 | 186 | 122 |
| MEDIUM | 6 Med | Bu60   | 120 | 120 | 184 | 184 | 122 |
| MEDIUM | 6 Med | Bu60   | 120 | 120 | 184 | 184 | 122 |
| MEDIUM | 6 Med | Bu60   | 120 | 124 | 184 | 186 | 122 |
| MEDIUM | 6 Med | Bu60   | 120 | 124 | 184 | 186 | 122 |
| MEDIUM | 6 Med | BU63!  | 120 | 120 | 184 | 184 | 120 |
| MEDIUM | 6 Med | BU63   | 120 | 120 | 184 | 184 | 120 |
| MEDIUM | 6 Med | BU63   | 120 | 120 | 184 | 188 | 120 |
| MEDIUM | 6 Med | BU63   | 120 | 124 | 184 | 188 | 120 |
| MEDIUM | 6 Med | BU63   | 120 | 124 | 184 | 188 | 120 |
| MEDIUM | 6 Med | BU70!  | 120 | 124 | 184 | 184 | 122 |
| MEDIUM | 6 Med | BU70   | 120 | 122 | 184 | 184 | 120 |
| MEDIUM | 6 Med | BU70   | 120 | 124 | 184 | 184 | 122 |
| MEDIUM | 6 Med | BU70   | 120 | 124 | 184 | 186 | 122 |
| MEDIUM | 6 Med | BU70   | 124 | 124 | 184 | 184 | 122 |
| MEDIUM | 6 Med | BU70   | 120 | 120 | 184 | 184 | 122 |
| MEDIUM | 6 Med | BU70   | 120 | 124 | 184 | 184 | 122 |
| MEDIUM | 6 Med | BU70   | 120 | 124 | 184 | 186 | 120 |
| MEDIUM | 6 Med | BU70   | 120 | 124 | 184 | 184 | 122 |

|        |       |      |     |     |     |     |     |
|--------|-------|------|-----|-----|-----|-----|-----|
| MEDIUM | 6 Med | BU9! | 116 | 120 | 186 | 186 | -9  |
| MEDIUM | 6 Med | BU9  | 116 | 124 | 186 | 188 | 120 |
| MEDIUM | 6 Med | BU9  | 116 | 120 | 186 | 188 | 122 |
| MEDIUM | 6 Med | BU9  | 120 | 124 | 186 | 186 | 120 |
| MEDIUM | 6 Med | BU9  | 120 | 124 | 186 | 186 | 116 |
| MEDIUM | 6 Med | BU9  | 120 | 124 | 186 | 186 | 116 |
| MEDIUM | 6 Med | BU9  | 120 | 124 | 186 | 186 | 116 |
| MEDIUM | 6 Med | BU9  | 120 | 124 | 186 | 186 | 116 |
| MEDIUM | 6 Med | BU9  | 120 | 124 | 186 | 188 | 118 |
| MEDIUM | 6 Med | BU9  | 120 | 124 | 186 | 186 | 116 |

| 1233-2 | Primer 4 |        | Primer 5 |        | Primer 6 |        |
|--------|----------|--------|----------|--------|----------|--------|
|        | 4536-1   | 4536-2 | 4483-1   | 4483-2 | 1808-1   | 1808-2 |
| 122    | 183      | 193    | 220      | 220    | 300      | 300    |
| 122    | 188      | 193    | 206      | 220    | 300      | 300    |
| 124    | 193      | 193    | 220      | 230    | 300      | 300    |
| 122    | 193      | 193    | 220      | 230    | 297      | 300    |
| 122    | 193      | 193    | 206      | 214    | 297      | 300    |
| 124    | 193      | 193    | 214      | 220    | 297      | 300    |
| 122    | 193      | 193    | 214      | 220    | 297      | 300    |
| -9     | 193      | 193    | 214      | 220    | 297      | 300    |
| 128    | 193      | 193    | 228      | 228    | 297      | 300    |
| 120    | 193      | 193    | 206      | 220    | 300      | 309    |
| 120    | 193      | 193    | 228      | 228    | -9       | -9     |
| 124    | 193      | 193    | 220      | 224    | -9       | -9     |
| 120    | 193      | 193    | 220      | 228    | -9       | -9     |
| 120    | 193      | 193    | 220      | 228    | -9       | -9     |
| 122    | 193      | 193    | -9       | -9     | 297      | 300    |
| 122    | 193      | 193    | 216      | 228    | 297      | 297    |
| 122    | 193      | 193    | 228      | 228    | 297      | 300    |
| 122    | 193      | 193    | 206      | 228    | 300      | 300    |
| 122    | 193      | 193    | 216      | 220    | 300      | 300    |
| 122    | 193      | 193    | 220      | 228    | 297      | 300    |
| 122    | 193      | 193    | 220      | 228    | 297      | 300    |
| 124    | 183      | 193    | 220      | 233    | 300      | 300    |
| 124    | 183      | 193    | 233      | 233    | 294      | 300    |
| 124    | 186      | 193    | 220      | 220    | 300      | 303    |
| 126    | 186      | 193    | 220      | 220    | 300      | 303    |
| 126    | 186      | 193    | 220      | 220    | 300      | 303    |
| 126    | 186      | 193    | 220      | 220    | 300      | 303    |
| 126    | 186      | 193    | 220      | 220    | 303      | 309    |
| 124    | 186      | 193    | 220      | 220    | 297      | 300    |
| 124    | 186      | 186    | 220      | 220    | 309      | 309    |
| 126    | 186      | 193    | 206      | 220    | -9       | -9     |
| 126    | 186      | 193    | 220      | 220    | 300      | 309    |
| 124    | 193      | 193    | 224      | 224    | 300      | 309    |
| 120    | 193      | 193    | -9       | -9     | -9       | -9     |
| 124    | 193      | 193    | 220      | 224    | 309      | 309    |
| 124    | 193      | 193    | 216      | 224    | 300      | 309    |
| 120    | 193      | 199    | 220      | 224    | 300      | 309    |
| 124    | 193      | 193    | 224      | 228    | 300      | 309    |
| 120    | 193      | 193    | 224      | 224    | 294      | 309    |
| 120    | 193      | 193    | 220      | 224    | 303      | 309    |
| 126    | 193      | 193    | 220      | 224    | 300      | 309    |
| 126    | 193      | 193    | 220      | 224    | 300      | 309    |
| 120    | 193      | 193    | 220      | 224    | 300      | 309    |
| 122    | 186      | 193    | 220      | 220    | 303      | 306    |
| 122    | 186      | 193    | 220      | 228    | 297      | 306    |
| 120    | 183      | 193    | 220      | 220    | 297      | 300    |
| 120    | 193      | 193    | 206      | 220    | 294      | 306    |





|     |     |     |     |     |     |     |
|-----|-----|-----|-----|-----|-----|-----|
| 122 | 193 | 193 | 228 | 228 | 300 | 303 |
| 122 | 193 | 193 | 220 | 230 | 300 | 309 |
| 120 | 193 | 193 | 220 | 220 | 300 | 309 |
| 122 | 193 | 193 | 220 | 220 | 300 | 303 |
| 122 | 193 | 193 | 220 | 220 | 300 | 309 |
| 122 | 193 | 193 | 220 | 220 | 300 | 309 |
| 122 | 193 | 193 | 220 | 220 | 300 | 300 |
| 122 | 193 | 193 | 220 | 220 | 300 | 309 |
| 122 | 193 | 193 | 206 | 206 | -9  | -9  |
| 122 | 193 | 193 | 230 | 230 | 294 | 294 |
| 122 | 193 | 193 | 206 | 230 | 294 | 300 |
| 122 | 193 | 193 | 220 | 220 | 300 | 300 |
| 126 | 193 | 193 | 220 | 220 | -9  | -9  |
| 122 | 193 | 193 | 220 | 220 | 300 | 300 |
| 126 | 193 | 193 | 220 | 220 | 294 | 300 |
| 126 | 193 | 193 | 220 | 220 | 294 | 300 |
| 126 | 193 | 193 | 220 | 224 | 300 | 300 |
| 122 | 187 | 193 | 220 | 226 | 300 | 300 |
| 124 | 193 | 193 | 220 | 220 | 300 | 300 |
| 124 | 193 | 193 | 220 | 220 | 300 | 300 |
| 124 | 193 | 193 | 220 | 220 | 294 | 300 |
| 124 | 193 | 193 | 220 | 220 | 300 | 300 |
| 120 | 193 | 193 | 220 | 220 | -9  | -9  |
| 120 | 193 | 193 | 206 | 220 | 300 | 300 |
| 126 | 193 | 193 | 220 | 222 | -9  | -9  |
| 120 | 193 | 193 | 220 | 220 | -9  | -9  |
| 126 | 193 | 193 | 220 | 220 | -9  | -9  |
| 126 | 193 | 193 | 220 | 220 | 294 | 300 |
| 126 | 193 | 193 | 220 | 220 | -9  | -9  |
| 120 | 193 | 193 | 220 | 220 | 294 | 300 |
| -9  | 193 | 193 | -9  | -9  | -9  | -9  |
| 126 | 193 | 193 | 220 | 220 | 294 | 300 |
| 122 | 193 | 193 | 206 | 220 | 300 | 300 |
| 126 | 193 | 193 | 206 | 220 | 294 | 300 |
| 126 | 193 | 193 | 206 | 208 | 294 | 300 |
| 126 | 193 | 193 | 206 | 220 | 294 | 300 |
| 122 | 187 | 193 | 206 | 220 | 300 | 303 |
| 122 | 193 | 193 | 206 | 220 | 300 | 300 |
| 122 | 193 | 193 | 206 | 220 | 300 | 300 |
| 122 | 193 | 193 | 206 | 220 | 300 | 300 |
| 122 | 187 | 193 | 206 | 226 | -9  | -9  |
| 122 | 187 | 193 | 206 | 220 | 300 | 300 |
| 120 | 193 | 193 | 216 | 220 | 300 | 303 |
| 120 | 193 | 193 | 220 | 220 | 291 | 300 |
| 120 | 193 | 193 | 220 | 220 | 300 | 300 |
| 120 | 187 | 193 | 220 | 220 | 300 | 300 |
| 118 | 193 | 193 | 220 | 230 | 300 | 300 |
| 120 | 190 | 193 | 220 | 220 | 300 | 303 |
| 118 | 187 | 193 | 220 | 230 | 300 | 300 |

|     |     |     |     |     |     |     |
|-----|-----|-----|-----|-----|-----|-----|
| 122 | 187 | 193 | 220 | 220 | 300 | 300 |
| 120 | 187 | 193 | 220 | 220 | 300 | 300 |
| 120 | 193 | 193 | 220 | 220 | 300 | 300 |
| 122 | 182 | 193 | 220 | 220 | 300 | 300 |
| 118 | 193 | 193 | 220 | 220 | 300 | 300 |
| 122 | 193 | 193 | 220 | 220 | -9  | -9  |
| 124 | 193 | 193 | 206 | 220 | 300 | 300 |
| 120 | 182 | 193 | 220 | 220 | 300 | 300 |
| 122 | 193 | 193 | 220 | 220 | -9  | -9  |
| 120 | 193 | 193 | 220 | 224 | 300 | 300 |
| 120 | 186 | 193 | 220 | 220 | 300 | 300 |
| 120 | 182 | 193 | 220 | 220 | 300 | 300 |
| 122 | 193 | 193 | 220 | 224 | 300 | 300 |
| 122 | 186 | 193 | 224 | 224 | 300 | 300 |
| 122 | 193 | 193 | 224 | 228 | 300 | 300 |
| 122 | 186 | 193 | 220 | 224 | 300 | 303 |
| 124 | 193 | 193 | 224 | 228 | 300 | 300 |
| 122 | 186 | 193 | 224 | 224 | 300 | 300 |
| 120 | 193 | 193 | -9  | -9  | 300 | 303 |
| 120 | 193 | 193 | 206 | 224 | 300 | 303 |
| 120 | 193 | 193 | 224 | 230 | 303 | 309 |
| 120 | 193 | 193 | 206 | 224 | 300 | 303 |
| 116 | 193 | 193 | 206 | 206 | 300 | 303 |
| 120 | 193 | 193 | 206 | 206 | 300 | 303 |
| 120 | 193 | 193 | 206 | 224 | 300 | 303 |
| 120 | 193 | 193 | 224 | 224 | 300 | 303 |
| 122 | 186 | 193 | 208 | 220 | 294 | 300 |
| 122 | 193 | 193 | 220 | 220 | 294 | 294 |
| 120 | 193 | 193 | 208 | 208 | 294 | 294 |
| 122 | 193 | 193 | 208 | 208 | 294 | 294 |
| 120 | 193 | 193 | 208 | 220 | 294 | 294 |
| 120 | 193 | 193 | 220 | 220 | 294 | 294 |
| 122 | 193 | 193 | 220 | 220 | 294 | 294 |
| 120 | 193 | 193 | 220 | 220 | 294 | 300 |
| 122 | 193 | 193 | 208 | 220 | 294 | 294 |
| 122 | 193 | 193 | 220 | 220 | 294 | 294 |
| 122 | 193 | 193 | 220 | 220 | 294 | 294 |
| 120 | 193 | 193 | 220 | 220 | 300 | 309 |
| 120 | 193 | 193 | 220 | 220 | 300 | 309 |
| 122 | 193 | 193 | 200 | 220 | 300 | 309 |
| 120 | 193 | 193 | 220 | 220 | 309 | 309 |
| 120 | 193 | 193 | 220 | 220 | 309 | 309 |
| 120 | 183 | 193 | 220 | 220 | 300 | 309 |
| 120 | 193 | 193 | 206 | 220 | 303 | 309 |
| 120 | 193 | 193 | 206 | 220 | 303 | 309 |
| 120 | 193 | 193 | 220 | 220 | 300 | 309 |
| 122 | 193 | 193 | 220 | 220 | 309 | 309 |
| 122 | 193 | 193 | 220 | 224 | 300 | 309 |
| 122 | 193 | 193 | 220 | 224 | 300 | 309 |

|     |     |     |     |     |     |     |
|-----|-----|-----|-----|-----|-----|-----|
| 124 | 193 | 193 | 220 | 224 | 300 | 300 |
| 124 | 193 | 193 | 220 | 220 | 309 | 309 |
| 120 | 193 | 193 | 220 | 224 | 309 | 309 |
| 122 | 193 | 193 | 220 | 228 | 294 | 309 |
| 122 | 193 | 193 | 220 | 228 | 294 | 309 |
| 120 | 193 | 193 | 220 | 228 | 294 | 309 |
| 120 | 193 | 193 | 220 | 228 | 300 | 309 |
| 124 | 184 | 193 | 220 | 224 | 300 | 300 |
| 124 | 193 | 193 | 220 | 224 | 294 | 300 |
| 120 | 188 | 193 | 220 | 220 | 300 | 300 |
| 120 | 188 | 193 | 220 | 220 | 300 | 300 |
| 120 | 188 | 193 | 220 | 224 | 300 | 300 |
| 120 | 188 | 193 | 220 | 220 | 300 | 300 |
| 120 | 188 | 193 | 220 | 220 | 300 | 300 |
| -9  | 186 | 193 | 220 | 226 | 294 | 300 |
| 124 | 193 | 193 | 220 | 226 | 294 | 300 |
| 124 | 193 | 193 | 226 | 226 | 294 | 300 |
| 124 | 193 | 193 | 220 | 226 | 300 | 300 |
| 124 | 193 | 193 | 220 | 226 | 294 | 300 |
| 124 | 193 | 193 | 220 | 226 | 294 | 300 |
| 124 | 193 | 193 | 220 | 224 | 294 | 300 |
| 124 | 193 | 193 | 224 | 226 | 294 | 294 |
| 124 | 193 | 193 | 224 | 226 | 294 | 294 |
| 120 | 188 | 193 | 226 | 226 | 300 | 300 |
| 124 | 188 | 193 | 226 | 226 | 300 | 300 |
| 120 | 188 | 193 | 226 | 226 | 300 | 300 |
| 124 | 188 | 193 | 206 | 206 | 300 | 309 |
| 124 | 193 | 193 | 200 | 206 | 300 | 300 |
| 124 | 186 | 193 | 206 | 220 | 309 | 309 |
| 124 | 186 | 193 | 206 | 206 | 300 | 309 |
| 124 | 193 | 193 | 200 | 206 | 300 | 309 |
| 124 | 193 | 193 | 206 | 220 | -9  | -9  |
| 124 | 188 | 193 | 206 | 220 | -9  | -9  |
| 124 | 188 | 193 | 206 | 220 | 309 | 309 |
| 124 | 188 | 193 | 206 | 220 | 300 | 309 |
| 120 | 193 | 193 | 220 | 220 | 300 | 300 |
| 122 | 193 | 193 | 220 | 220 | 300 | 300 |
| 122 | 193 | 193 | 220 | 224 | 300 | 303 |
| 122 | 193 | 193 | 220 | 220 | 300 | 300 |
| 120 | 184 | 193 | 206 | 220 | 300 | 309 |
| 124 | 193 | 193 | 224 | 224 | 300 | 300 |
| 124 | 193 | 193 | 224 | 224 | 294 | 300 |
| 124 | 186 | 193 | 224 | 224 | 300 | 300 |
| 124 | 193 | 193 | 224 | 228 | 300 | 300 |
| 124 | 193 | 193 | 224 | 224 | 300 | 300 |
| 124 | 193 | 193 | 224 | 224 | 300 | 300 |
| 124 | 193 | 193 | 224 | 224 | 300 | 300 |
| 122 | 188 | 193 | 208 | 224 | 294 | 300 |
| 124 | 193 | 193 | 224 | 230 | 300 | 300 |

|     |     |     |     |     |     |     |
|-----|-----|-----|-----|-----|-----|-----|
| -9  | 193 | 193 | 200 | 220 | 300 | 300 |
| 124 | 193 | 193 | 220 | 224 | 300 | 300 |
| 124 | 193 | 193 | 200 | 220 | 300 | 300 |
| 122 | 193 | 193 | 220 | 220 | 300 | 300 |
| 120 | 193 | 193 | 200 | 220 | 300 | 300 |
| 118 | 193 | 193 | 220 | 224 | 300 | 300 |
| 120 | 193 | 193 | 200 | 220 | -9  | -9  |
| 122 | 193 | 193 | 200 | 220 | 300 | 300 |
| 122 | 193 | 193 | 220 | 220 | 300 | 300 |
| 122 | 187 | 193 | 220 | 220 | 300 | 300 |
| 122 | 193 | 193 | 200 | 220 | 300 | 300 |
